# Supplementary material for: Multiple reaction monitoring (MRM)-profiling with biomarker identification by LC-QTOF to characterize coronary artery disease
Source: Royal Society of Chemistry journal article supplement (doi:10.1039/c8an01017j), 2018-01-01
Supplement: c8an01017j1.pdf [file c8an01017j1.pdf]

Electronic Supplementary Information (ESI)

## Multiple Reaction Monitoring (MRM)-Profiling with Biomarker Identification by LC-QTOF to Characterize Coronary Artery Disease

Karen E. Yannell<sup>1</sup>, Christina R. Ferreira<sup>1</sup>, Shane Tichy<sup>2</sup>, R. Graham Cooks<sup>1</sup>

<sup>1</sup>Chemistry Department, Purdue University, West Lafayette, IN 47907, US

<sup>2</sup>Agilent Technologies, Santa Clara, CA 95051, US

### Table of Contents

|                                                              |           |
|--------------------------------------------------------------|-----------|
| <b>1. EXPERIMENTAL SYSTEM .....</b>                          | <b>1</b>  |
| 1.1 INSTRUMENT CONFIGURATION AND SAMPLE INTRODUCTION .....   | 1         |
| 1.2 SAMPLE PREPARATION .....                                 | 2         |
| <b>2. METHOD DEVELOPMENT .....</b>                           | <b>3</b>  |
| 2.1 SOLVENT EVALUATION .....                                 | 3         |
| 2.2 ION SOURCE CONDITIONS .....                              | 4         |
| 2.3 DATA FOR DIFFERENT SOLVENTS AND COLLISION ENERGIES ..... | 4         |
| 2.4 PRECURSOR AND NEUTRAL LOSS SCAN OPTIMIZATION .....       | 6         |
| 2.5 PRECURSOR AND NEUTRAL LOSS OPTIMIZATION DATA .....       | 7         |
| 2.6 MRM OPTIMIZATION .....                                   | 13        |
| 2.7 EVALUATION OF PERFORMANCE .....                          | 14        |
| <b>3. ANALYTE IDENTIFICATION BY LC-HRMS .....</b>            | <b>16</b> |
| 3.1 LC-MS METHODS .....                                      | 16        |
| 3.2 LC-MS DATA .....                                         | 17        |

### 1. EXPERIMENTAL SYSTEM

#### 1.1 Instrument Configuration and Sample Introduction

Multiple reaction monitoring (MRM)-profiling is faster than liquid chromatography mass spectrometry (LC-MS) metabolomics methods because it directly introduces a diluted sample or simple extract into the MS. No time or materials for chromatography are required. Instead, with direct infusion (DI) or flow injection (FI) techniques, in lieu of LC, the user saves time and resources and they also analyze an intact or near intact sample. Ideally, no complex sample pretreatment is needed, just a simple dilution or fast extraction. Therefore, DI or FI can measure many analytes with varying chemical properties.<sup>1, 18</sup> This is a move closer to universal analysis of the metabolome.<sup>1, 2</sup>

FI is automatic and carries a small volume of diluted sample or extract (20 -40  $\mu$ L plug of sample) to the electrospray ionization source through LC pump lines with the solvent flow. However, as seen with this coronary artery disease (CAD) method and elsewhere, it can be more time consuming since the sample must travel to the source and more time is required for cleaning the solvent lines.<sup>35</sup> DI methods continuously introduce sample into the MS. These methods may require a larger volume of diluted sample (>200  $\mu$ L) and are difficult to automated. However, they are much faster since they require nearly no time to reach the source and minimal cleaning.

Another methodology that could be used with MRM-profiling is nano-infusion.<sup>1, 2</sup> This is similar to DI but it uses a very small amount of sample 5-20  $\mu$ L diluted sample and requires no time for cleaning since the nozzles are single use. This has been automated and is therefore amenable to high throughput analysis.<sup>1</sup> However, the method is sensitive to high salt content so not every biological sample may work with this setup. Ambient ionization methods may also be used but have been developed minimally with MRM-profiling. Briefly, paper spray ionization is limited by the time it can spray the sample, can have high background noise, and, similar to chromatography, some analytes can be retained on the paper and not analyzed.<sup>12</sup>

If methods need to be faster and without a discrimination study to minimize the transition set, DI and nano-infusion methods should be used. DI and nano-infusion methods continuously introduce sample to the MS, have less chance of carryover, and in principle should be faster than FI. As demonstrated with this method, FI methods have a discrete amount of time the sample is introduced and may require more than one injection to collect data for all the ion transitions. Each injection takes time to travel to the source and requires additional time to clean solvent lines. This adds significant time to the method and a discrimination study is performed to reduce the analysis time.

## 1.2 Sample Preparation

For high throughput sample preparation, several of these steps were automated by using a Bravo liquid-liquid handler (Table S1) and 96-well plates were employed. Given more time for development the whole workflow could be automated.

Table S1 Modified Bligh-Dyer sample preparation procedures of human plasma for MRM-profiling <sup>a</sup>

| Step: | Addition of:                                                    | Volume ( $\mu$ L) | Manual/Bravo |
|-------|-----------------------------------------------------------------|-------------------|--------------|
| 1     | Plasma                                                          | 40                | Manual       |
| 2     | Chloroform                                                      | 100               | Bravo        |
| 3     | Methanol                                                        | 180               | Bravo        |
| 4     | Vortex, 30s                                                     |                   | Manual       |
| 5     | Chloroform                                                      | 100               | Bravo        |
| 6     | Water                                                           | 100               | Bravo        |
| 7     | Vortex, 60 s                                                    |                   | Manual       |
| 8     | Centrifuge, 60 m, 4000 RPM                                      |                   | Manual       |
| 9     | Collect 75 $\mu$ L top and bottom layer, place in new container |                   | Manual       |

|           |                               |        |
|-----------|-------------------------------|--------|
| <b>10</b> | Dry down, SpeedVac, 50C, ~3hr | Manual |
| <b>11</b> | Solvent 300                   | Bravo  |
| <b>12</b> | Sonicate, 10 m                | Manual |
| <b>13</b> | Centrifuge, 10 m, 4000 RPM    | Manual |
| <b>14</b> | Dilute 20X into solvent       | Bravo  |

- a) The addition of samples and reagents and their respective volumes are listed. Notes for if the step was performed manually or by the Bravo liquid-liquid handler and additional sample preparation details are given.

After step 8, of sample preparation (Table S1) three layers exist, a top aqueous and polar layer containing polar metabolites, a middle solid white layer of protein, and a bottom chloroform layer containing lipids. An issue that arose during the project was that the protein layer did not fully pack and would inconsistently interfere with the collection of the lower layer. More centrifugation was needed for these samples. This could be avoided in future experiments by (1) using less plasma and thus minimizing the protein layer or (2) using a higher speed rotor for centrifugation (20,000 rpm, not 4,000 rpm). These suggestions were tested successfully on a single sample.

This final sample preparation procedure was used for every MRM-profiling experiment. During development, the sample preparation was often performed one sample at a time, not a 96 well plate format, or using alternative volumes. These differences are noted for each experiment in the sections below.

## 2. METHOD DEVELOPMENT

### 2.1 Solvent Evaluation

The solvent and modifier conditions are influential parameters for this analysis and their development should be considered for every MRM-profiling project. For MRM-profiling the solvent and source conditions should aim to dissolve and ionize all analytes in the sample. Given the diversity of the analytes in a biological system this is difficult to achieve. If information is known about the analytes in the sample or of interest in the disease, a solvent can be tailored for those. In no information about what analytes are of interest, then optimization should aim at detection of as many different types of analytes as possible. For the CAD solvent optimization, tradeoffs in ionizing one class of molecules over another occurred. But by exploring different options with simple experiments, clear data was gathered as to which solvent was best.

A few solvents were tested with the plasma extract. These were known to give good signal for lipids, however, their performance with small metabolites was unknown.<sup>13, 36, 52</sup> The following solvents were used both to reconstitute the dried plasma extracts (step 11, Table S1) and as the pump solvent.

- 1: 70% acetonitrile, 30% methanol, 10 ppm ammonium formate, 0.1% formic acid
- 2: 90% methanol, 10% chloroform, 10 ppm ammonium formate, 0.1% formic acid
- 3: 66% chloroform, 33% methanol, 10 ppm ammonium formate, 0.1% formic acid

## 2.2 Ion Source Conditions

Source conditions with the Agilent Jet Stream (AJS) needed to be optimized for each solvent system under consideration. This was done manually by optimizing the parameters in Table S2. The parameters were optimized in the order listed by injecting a reserpine standard diluted in the solvent and selecting the condition with the highest absolute signal intensity. Also, a phosphatidylcholine (PC) lipid was added to the sample to have optimization run including a lipid molecule. The AJS parameters for solvent 1 and solvent 2 are in Table S2.

Table S2 AJS source parameters optimized with the ranges and steps tested <sup>a</sup>

| Parameter              | Unit  | Range     | Step | Solvent 1 | Solvent 2 |
|------------------------|-------|-----------|------|-----------|-----------|
| Capillary voltage      | V     | 2000-4000 | 500  | 2500      | 3500      |
| Sheath gas temperature | C     | 50-300    | 50   | 150       | 200       |
| Sheath gas flow        | L/min | 4-12      | 2    | 6         | 6         |
| Gas temperature        | C     | 50-350    | 50   | 300       | 350       |
| Gas flow               | L/min | 3-13      | 2    | 7         | 11        |
| Nebulizer              | psi   | 20-60     | 10   | 25        | 60        |

- a) Each parameter was tested individually by injecting a standard (n=3) and selecting the value with the highest MRM signal of the standard. AJS parameters optimized for solvent 1 and solvent 2 when using a flow rate of 0.05 mL/min are listed as well.

The nozzle voltage was not evaluated and this remained at 1500V for all experiments. These parameters were optimized using a flow rate of 0.05 mL/min. For any flow rate significantly different from this, source conditions may need to be reevaluated. Under these conditions, solvent 1 and 2 had pressures of 20 and 30 bar, respectively.

## 2.3 Data for Different Solvents and Collision Energies

Solvent 3 is commonly used for lipid analysis.<sup>52</sup> However, here it caused the ammonium formate to crash out in the source and continuously clogged the nebulizer regardless of the AJS source parameters. This solvent was therefore eliminated. With optimized AJS conditions, solvent 1 gave 100X greater signal for reserpine. Analysis of an undiluted plasma extract in solvent 1 gave very good results for a PC, positive mode, precursor (Prec) 184 scan (data not shown).

However, upon inspecting the negative mode, it was found that the solvent 1 did not dissolve and/or ionize the plasma extract sample well. Figure S1 shows negative mode full scan spectra of the lipid region,  $m/z$  530-980. No negative mode peaks were seen with solvent 1 (Figure S1, A) but solvent 2 had distinct lipid signals (Figure S1, B). Solvent 2 was selected and evaluated for acid addition.

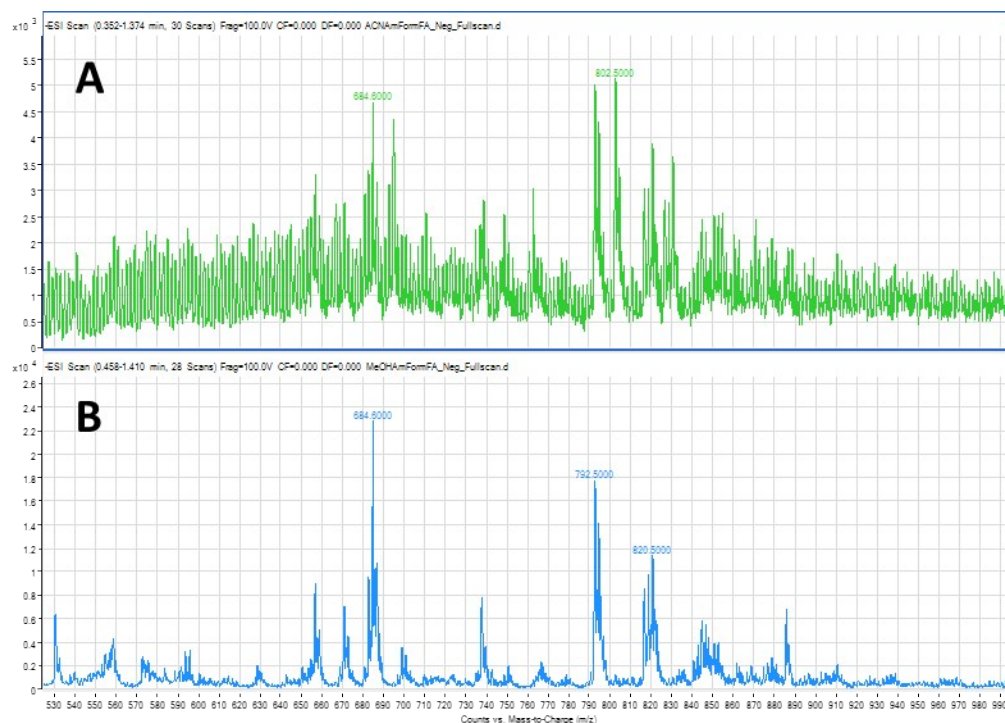

Figure S1 Negative mode, full scan spectra from  $m/z$  530-990 of a human plasma extract reconstituted and injected with either (A) solvent 1 (70% acetonitrile, 30% methanol, 10 ppm ammonium formate, 0.1% formic acid, top) or (B) solvent 2 (90% methanol, 10% chloroform, 10 ppm ammonium formate, 0.1% formic acid, bottom).

Modifiers help create certain adducts but they should only be used if they do not impair compound ionization of other analytes. Figure S2 shows positive mode, Prec spectra of human plasma sample in solvent 2 prepared with (A) and without acid (B). The solvent with acid had  $10^4$  signal and many small metabolites below  $m/z$  315 were only seen with this solvent. However, the peaks that appeared with no acid, namely  $m/z$  369.1 and 426.0 were present at the same intensity in both solvents.

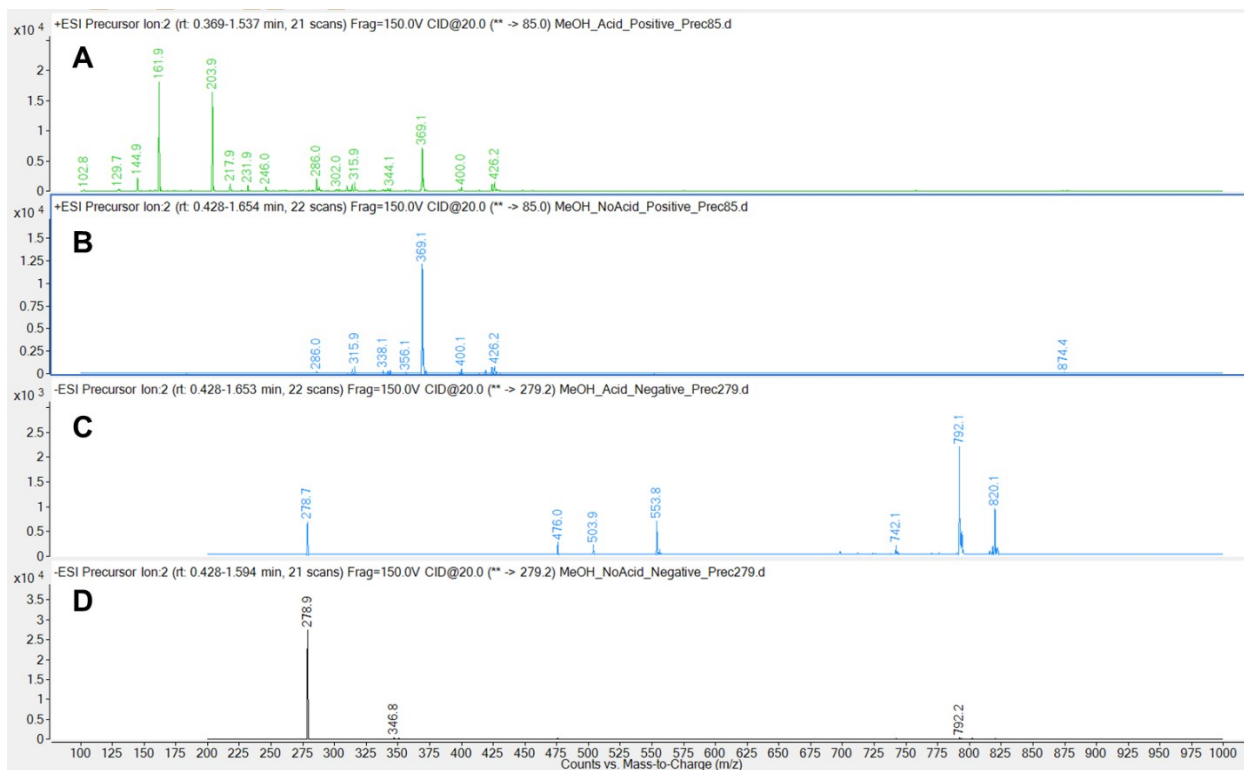

Figure S2 Positive mode, Prec 85 scan (CE 20) from  $m/z$  100-1000 of plasma sample prepared and sprayed with solvent 2 with acid (A) and solvent without acid (B). Negative mode, Prec 279.2 scan (CE 20) from  $m/z$  200-1000 of plasma sample prepared and sprayed with solvent 2 with acid (C) and solvent without acid (D).

Similar profiles are found for both solvents in the negative mode (Figure S2, C and D). A Prec 279.2 scan using solvent (C) which contains acid gave several additional peaks compared to solvent without acid (D). Because of the numerous additional peaks in both the positive and negative mode, the acidified solvent was better for this method than the solvent without modifier.

The use of the automated auto-sampler required a solvent for washing the needle that collected and injected the sample to prevent needle carryover. A 2:2:1 mixture of methanol: isopropyl alcohol: chloroform was selected to remove both polar and lipid material.

## 2.4 Precursor and Neutral Loss Scan Optimization

Initial Prec and neutral loss (NL) tests were performed using a pooled plasma sample prepared with solvent 1. Samples were treated as described in Table S1 except that 150  $\mu$ L of the top and bottom layers were collected, the sample was dried for a longer period of time at 36 C, and the sample was reconstituted in 400  $\mu$ L solvent 1. This sample was then tested with no further dilution and also with a 20X and 200X dilution of the reconstituted extract into solvent 1.

For optimization a random selection of Prec and NL scans in both positive and negative mode were selected to be used for optimization of scan parameters. The goal was to create a method that was fast, reproducible, required one injection of sample, measured three or more collisions energies, and could easily be analyzed with MassHunter Qualitative software. The dilutions of the sample extract were also tested and carryover initially evaluated. Note, all Prec and NL scans covered the largest mass/charge range possible from  $m/z$  50-1000 but certain NL scans were limited on the low end. Discovery scans for some MRM-profiling projects could go higher than this range.

## 2.5 Precursor and Neutral Loss Optimization Data

Optimized scan speed and sample injection volume were key for obtaining good spectra in one injection for three CE values (5, 20, and 35 eV). Figures S3 and S4 show spectra collected at different scan speeds with a positive mode NL 32 and NL 299 scan, respectively. The NL 32 scan (Figure S3) is one that gives low single from this sample overall and it has the largest expected scan range of any of the scans in the discovery phase. If this scan can be improved it is assumed the data for all the other Prec and NL scans will also improve. The 200 ms scan speed (Figure S3, A) is too fast to measure any significant signal. The 500 and 1000 ms scans (Figure S3, B and C) show a higher  $m/z$  126.9 peak but the 2000 ms scan (Figure S3, D) shows the highest intensity for  $m/z$  126.9 and a clear  $m/z$  318.9 peak.

The NL 299 scan in Figure 4S has a much higher signal overall from the human plasma extract. However, an improvement in peak shape can be seen in the  $m/z$  820-920 region as scan time increases from 500 to 1000 ms (Figure S4 A, B). In both these examples, spectrum quality can be improved by increasing scan time and this parameter should always be evaluated for discovery phase experiments.

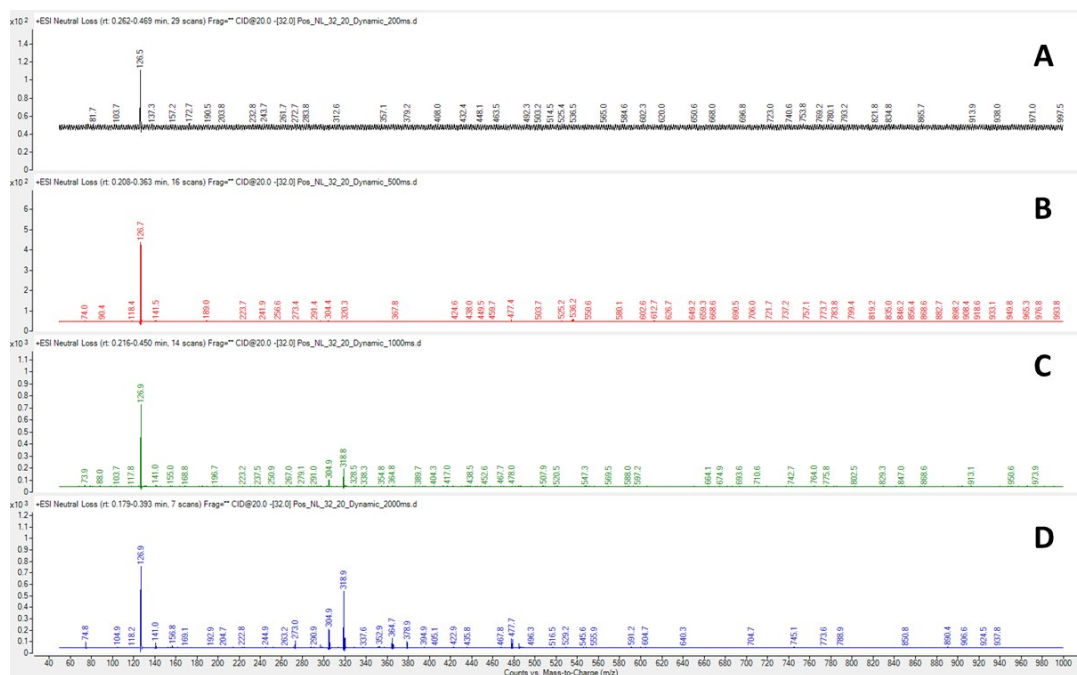

Figure S3 Positive mode NL 32 from  $m/z$  50-1000 collected with four different scan times: 200 (A), 500 (B), 1000 (C), and 2000 (D) ms. This data was collected with a 200X diluted human plasma extract in solvent 2.

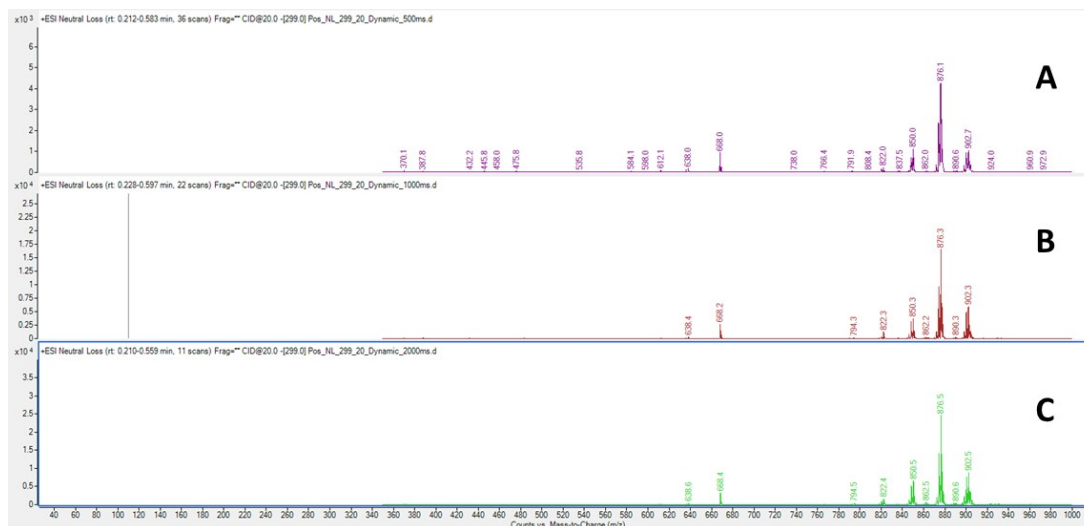

Figure S4 Positive mode NL 299 from  $m/z$  350-1000 collected with three different scan times: 500 (A), 1000 (B), and 2000 (C) ms. This data was collected with a 200X diluted human plasma extract in solvent 2.

In order to collect enough scans at three different CE (5, 20, 35 eV; 5-10 scans/CE) with a 1000 or 2000 ms scan time the length of time sample is sprayed into the MS must be increased. This can be accomplished by slowing down the flow rate to below 0.05 mL/min or by injecting more than 20  $\mu$ L of sample.

With the 1290 pump, the flow rate cannot be decreased without lowering the pressure to below 30 bar. Slowing down the flow rate was not an option with this configuration but it could be with a nanoLC. A better approach was to inject more sample. Given the sample preparation procedure, this is not an issue for plasma extracts but for projects with more precious sample this may not be possible and nano-infusion or DI might be a better option. Figure S5 shows a positive mode NL 299 scan injected with 20, 30, and 40  $\mu$ L of a 20X dilution of plasma extract. There is a clear increase in the time the sample was sprayed for the larger injection volume. Using 80% absolute intensity (y-axis) as a marker for sample cutoff, it can be approximated the spray times for the 20, 30, and 40  $\mu$ L injections are approximately 0.3, 0.5, and 0.9 minutes, respectively. The subsequent spectra show no difference in signal intensity or quality of peaks (Figure S5, inset). Note the tailing in the signal increases as the sample volume increases suggesting that a larger sample volume may require a longer wash period to prevent carryover.



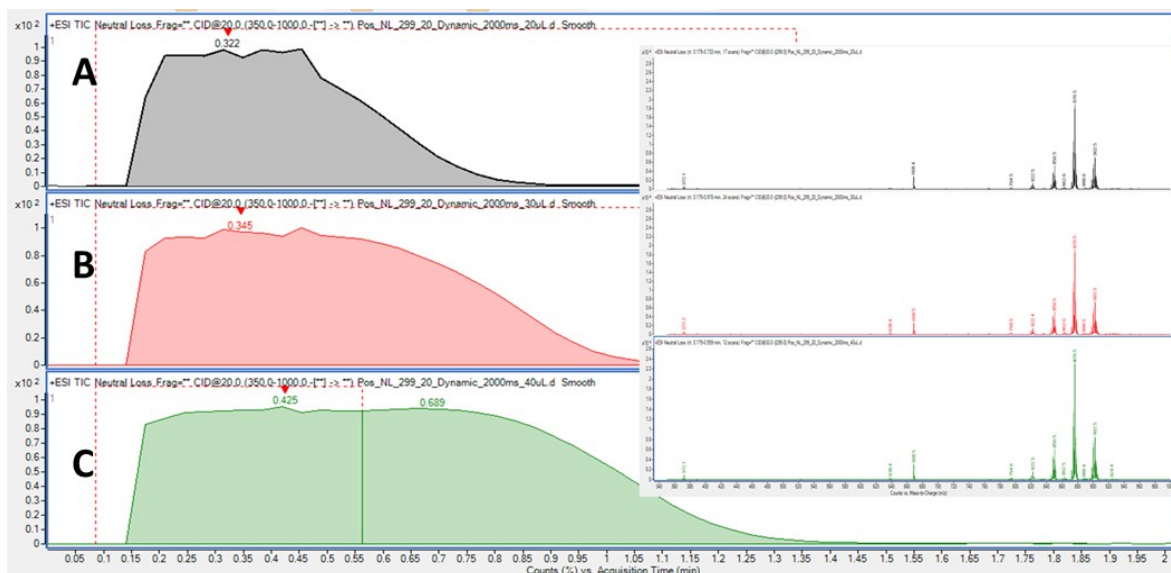

Figure S5 Three TICs of a plasma extract (20X dilution) injected at 20 (A), 30 (B), 40 (C) µL volumes. Extreme smoothing parameters were applied to get automatic integration. The spectra (inset) are averaged over the whole TIC integration.

With the larger injection volume it was possible to measure three CE in one injection and record ten scans using a 1000 ms scan speed (Figure S6). In order to simplify and automate data extraction, MassHunter Qualitative workflow was used. For each data file, the TICs for individual CE were separated. Next, the TIC signal could be smoothed into a pseudo Gaussian peak (as shown in Figure S5) and automatically integrated. Another approach was to alter the acquisition method to measure three different time segments. Segment one was full or product ion scan. Segment two was the Prec or NL scan for that method and it began when the sample is eluting. Segment three was a full or product ion scan and ended at the end of the injection (including the line wash). After the TIC for each CE was extracted, the extracted chronogram appears as a short segment of signal and was easily integrated (Figure S6). In all cases, a Qualitative software summation integration feature would benefit the Prec and NL scan data analysis workflow.

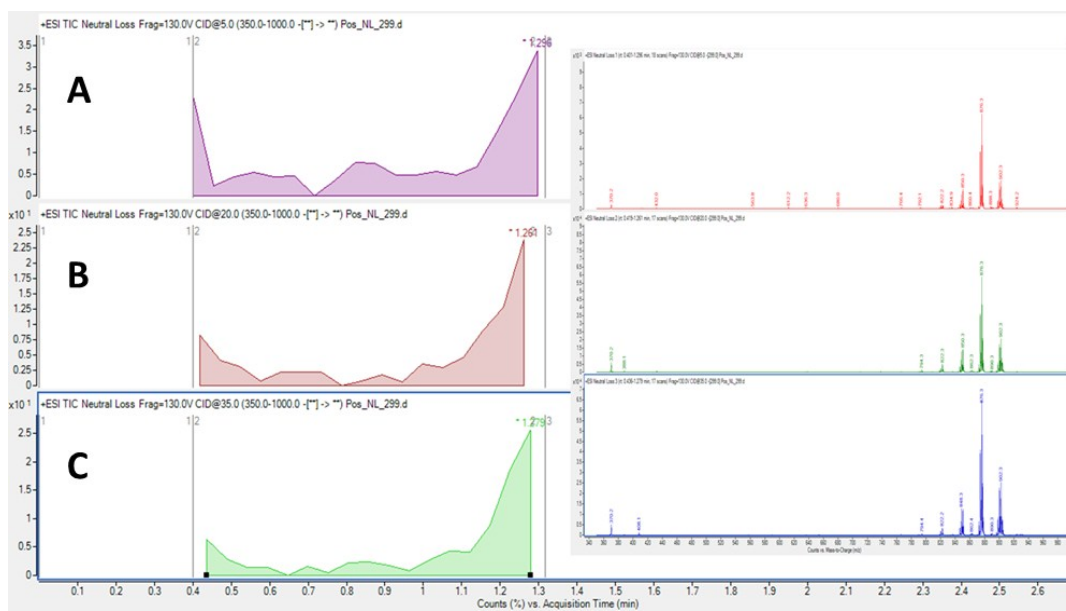

Figure S6 Positive mode NL 299 chronogram with three CE extracted and manually integrated. The data starts and stops at discrete points because the NL 299 scan was only set for that time segment. A, B, and C represent 5, 20, and 35 eV, respectively.

The 'Fragmentor Mode' in MassHunter Acquisition can be set to either 'Fixed' or 'Dynamic' mode. This was evaluated using two methods. One method was set to dynamic with a voltage ramp that include three ions:  $m/z$  118.0 at 90V,  $m/z$  666.5 at 130 V, and  $m/z$  874.6 at 210 V. The other method had a fixed fragmentation energy of 130 V. Spectra collected with both methods were compared (Figure S7). The signal quality appeared to be better for the fixed methods (Figure S7, A and D) and so the fragmentor was fixed in the Prec and NL methods. This may change given a different mass range and should be evaluated if the mass range changes.

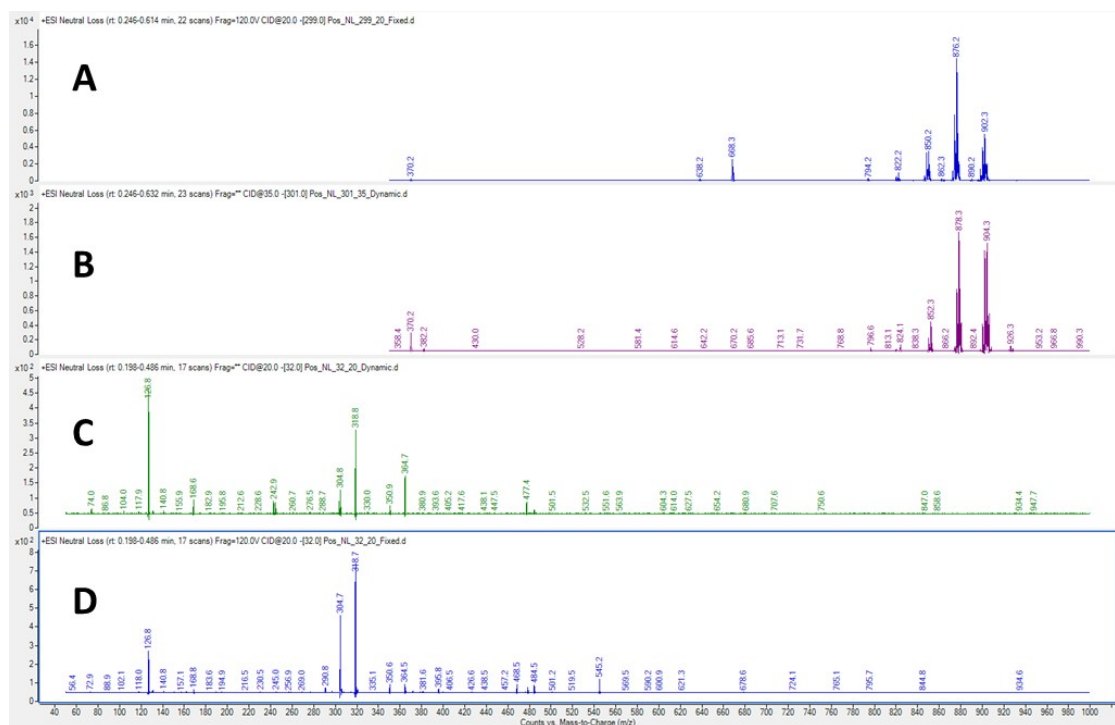

Figure S7 Fixed (A and D) and dynamic (B and C) fragmentor voltages for positive mode NL 301 scan (A and B) and positive mode scan (C and D). A 20X dilution of a plasma sample in solvent 2 was used for both.

One example of the final Prec and NL scan method is shown in Figure S8. Each Prec and NL scan had its own method. A full list of the Prec and NL scans is listed in the Table S5. These scans and their values were taken from literature sources and is continuously growing.<sup>4, 37-46</sup> Note not all Prec and NL scans need to be performed for every experiment. If *a priori* knowledge suggests targeting a group of molecules characterized by a few functional groups then those can be collected. However, if a project aims for independent (unsupervised) discovery, then many or all of the scans should be performed.

**A**

| Time segments |            |              |           |               |               |                                     |
|---------------|------------|--------------|-----------|---------------|---------------|-------------------------------------|
| #             | Start Time | Scan Type    | Div Valve | Delta EMV (+) | Delta EMV (-) | Stored                              |
| 1             | 0          | Product Ion  | To MS     | 0             | 0             | <input checked="" type="checkbox"/> |
| 2             | 0.4        | Neutral Loss | To MS     | 0             | 200           | <input checked="" type="checkbox"/> |
| 3             | 1.3        | Product Ion  | To MS     | 0             | 0             | <input checked="" type="checkbox"/> |

B

| Acquisition   | Source       | Chromatogram | Instrument | Diagnostics |           |            |                  |                          |          |
|---------------|--------------|--------------|------------|-------------|-----------|------------|------------------|--------------------------|----------|
| Scan segments |              |              |            |             |           |            |                  |                          |          |
| Segment Name  | Neutral Loss | MS1 From     | MS1 To     | Scan Time   | Frag Mode | Fragmentor | Collision Energy | Cell Accelerator Voltage | Polarity |
| ▶             | 121          | 150          | 1000       | 1000        | Fixed     | 130        | 35               | 5                        | Negative |
|               | 121          | 150          | 1000       | 1000        | Fixed     | 130        | 20               | 5                        | Negative |
|               | 121          | 150          | 1000       | 1000        | Fixed     | 130        | 5                | 5                        | Negative |

Figure S8 Example of MassHunter QQQ Acquisition method for Prec and NL scans. A) Time segments were used to measure the Prec or NL from 0.4 min to 1.3 min. B) An example of the acquisition parameters used for Prec and NL scans. The mass range was maximized in each scan by setting 'MS1 From' to the lowest possible value but 'MS1 To' never exceeded  $m/z$  1000.

Carryover should be initially assessed at this point. Three blanks (solvent 2) were analyzed with representative scans. Then, six samples were analyzed followed by three more blanks. The needle wash time or the wash solvent can be changed to remove sample carryover from the well. Removing carryover in the lines with a longer wash period should be avoided because it increases the method time (injection to injection) and decreases throughput of the method. In all of the above experiments a 20X dilution provided high signal for various analytes, did not appear to have carryover, and was chosen as the sample preparation dilution at this stage.

For the discovery phase, each study should have a minimum of two pooled samples (*i.e.* control and disease). This pooling can be simple: mix ten disease and ten control samples to make a disease and control pool. Ideally there would be more than ten individual samples in each pool to reduce the variability even more. Additionally, more groupings can be created to emphasize different biomarkers related to subpopulations of a disease or different severities of disease. Subpopulation pools are good to include so their specific up regulated biomarkers will be higher and related transitions will therefore be included in the MRM method. This allows for variants of the analytical procedure to be performed after data collection. For this project, control, high CAD, low CAD and peripheral artery disease (PAD) pools were each created from 30 individual samples. The high and low designations were taken from descriptions in the clinician notes of the diagnosis (*i.e.* severe and mild).

To create list of transitions from the Prec and NL data, a MassHunter Qualitative workflow was used to work up each data file. First, chromatograms were separated by CE, then integrated,  $m/z$  peak lists copied to Excel. In the Qualitative workflow a noise threshold was applied to the peak list (*i.e.* 500 counts). To make the transition lists (from the Prec or NL data), the following parameters for each  $m/z$  peak were listed in Excel: mode (positive or negative), precursor ion, scan type (Prec or NL), scan value (Prec or NL value), CE (eV), and intensity of the peak (counts). From the precursor ion  $m/z$  value, scan type, and scan value the product ion was calculated. After the signals for all the transitions were combined, there were overlapping transitions. Filtering was done to leave one unique transition per CE (parameters with the highest intensity were retained). Additional filtering was done to remove overlapping transitions *e.g.* 780.1  $\rightarrow$  184.0 vs 780.2  $\rightarrow$  184.0.

The final list of transitions discovered with Prec and NL scans vary in length (500-6000 transitions) depending on how many scans are tested, the  $m/z$  range of the scans, the complexity of the sample, and the criteria for 'discovery'. In summary, this Prec and NL experiment optimization aimed to create a scan method that acquired fast and reproducible signal. In the workflow, the data was easily extracted and combined in a final transition list for MRM experiments.

## 2.6 MRM Optimization

Many of the parameters optimized in Prec and NL development were carried over to the MRM method. The final parameter to optimize was dwell time. The sample preparation and total MRM method reproducibility were also evaluated at this stage.

The dwell time optimization study used a pooled sample prepared as described in Table S3 but with a 20X dilution. Methods with varying dwell times (5-100 ms) were created and each contained the thirty highest and thirty lowest responding transitions. The pooled sample was injected six times for each method. The height of each transition was recorded and the relative standard deviation (RSD) for the height was calculated (Table S3).

Table S3 Dwell time study summary <sup>a</sup>

| <b>30 Highest Intensity Transitions</b> |         |         |         |         |         |
|-----------------------------------------|---------|---------|---------|---------|---------|
| Dwell time (ms)                         | 5       | 10      | 20      | 50      | 100     |
| Average height (counts)                 | 160,509 | 161,387 | 161,677 | 158,929 | 131,661 |
| Average RSD                             | 4%      | 3%      | 3%      | 3%      | 2%      |
| RSD above 10%                           | 0       | 0       | 0       | 0       | 0       |
| <b>30 Lowest Intensity Transitions</b>  |         |         |         |         |         |
| Dwell time (ms)                         | 5       | 10      | 20      | 50      | 100     |
| Average height (counts)                 | 768     | 757     | 736     | 723     | 703     |
| Average RSD                             | 9%      | 8%      | 6%      | 4%      | 4%      |
| RSD above 20%                           | 1*      | 0       | 0       | 0       | 0       |
| RSD above 15%                           | 3*      | 4*      | 0       | 0       | 0       |

a) MRM methods with different dwell times contained 60 transitions and were measured with a human plasma extract (20X dilution) 6 times. Average height of the transitions and RSD are listed. The number of transitions with RSDs above 10%, 15%, or 20% are reported. The \* indicates that the transitions were below 200 counts.

The data showed that the highest responding transitions were very reproducible. All had RSDs below 10% and the average RSD for all the transitions was below 5%. The lowest responding transitions had more error as the dwell time decreased. The average RSD at 5 ms was 9% compared to 4% at 100 ms. However, this seemed to be caused by a few very poorly responding transitions (<200 counts). These transitions were likely noise and when they were removed the RSDs for all transitions and dwell times were below 15%. This data proves that a 5 ms dwell time is very reproducible with on the 6470 QQQ with these transitions and sample. This instrument can collect data even faster (0.5 ms dwell time). However, this is not necessary for our experiments due to a common software limitation; the MassHunter Acquisition software cannot contain more than 500 transitions per segment.

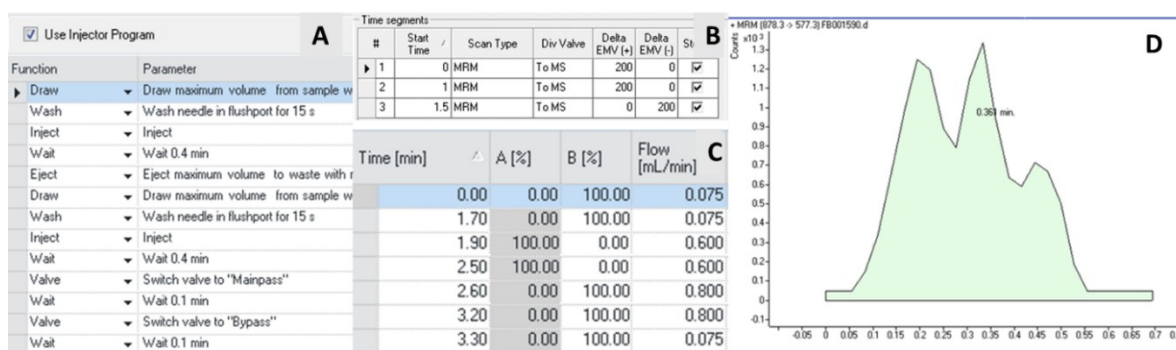

Figure S9 The final method utilized an injector program (A) to inject three 20  $\mu$ L injections per data file. Each injection was analyzed with a different transitions set by defining time segments (B). The pump (C) ran at a 75  $\mu$ L/min flow rate (Bottle B, solvent 2) followed by a wash method to clean the pump lines (Bottle A, 40% Methanol, 40% isopropyl alcohol, 20% chloroform). The data was integrated in MassHunter Quantitative software using spectral summation tool (D).

## 2.7 Evaluation of Performance

Until this point, sample preparation was performed on an individual sample scale. Testing the reproducibility of a 96-well plate sample preparation method is important to ensure each sample is prepared correctly by the procedure and liquid handler. This also tests the robustness of the FI-MRM method over many samples and a longer time period. For this study, a pooled sample was pipetted 96 times on a well plate and worked up using the method in Table S1 but with a 20X dilution. One injection per well was acquired using the MRM method. The principal component analysis (PCA) (Figure S10) showed separation of the samples over time. The first 48 injections (red) were separating from the last 48 injections (green).

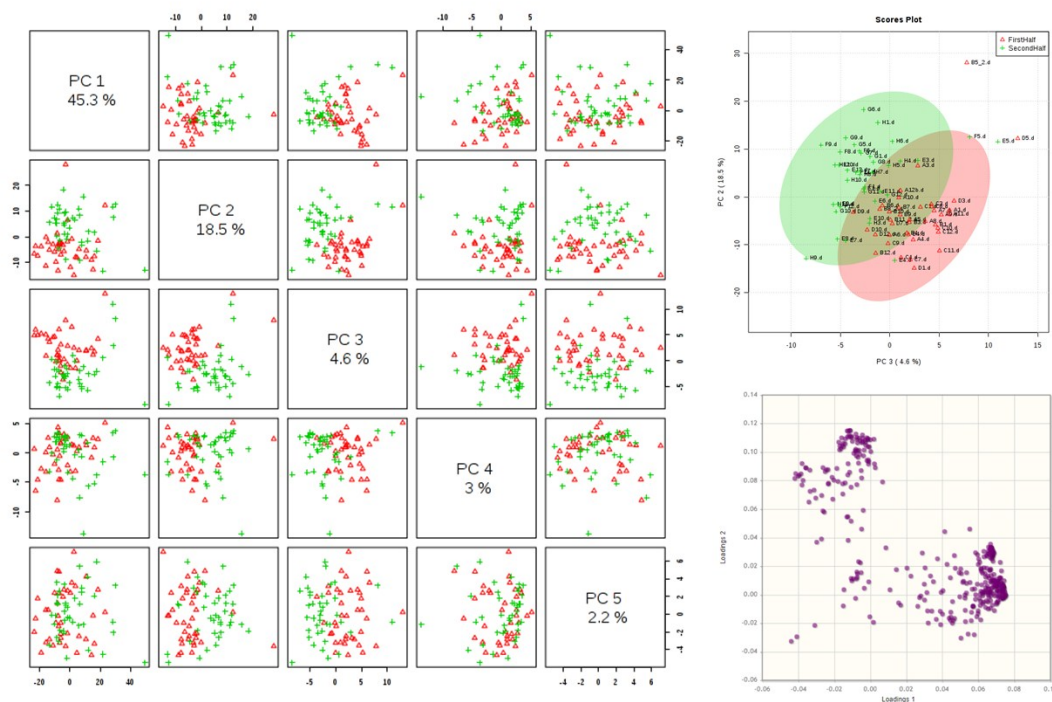

Figure S10 PCA plots for the first half (red) and second half (green) of a plate prepared with the same sample and collected using the same MRM method. The loading plot (bottom right) shows separation between identical lipid transitions due to carryover.

After investigating the issue, an increase in lipid signals was causing the separation (Figure S10, loading plot). This was due to carryover that was not detected previously. In an earlier study, carryover was evaluated by analyzing before and after solvent blanks with six injections of a 20X diluted sample in between. With Prec and NL scans, this showed no significant carryover. However, if 20 or more samples were injected, carryover was observed on the MRM method. The use of a quality control sample, which would be injected regularly between each few samples would detect this issue and make the bias quantifiable. It is hypothesized that lipids began to adhere to the stainless steel tubing and were subsequently observed in the after blanks. Initially, to solve this problem, a number of wash methods and solvents were tested to clean the lines after each injection. These did not work well enough and a dilution of the sample was ultimately made (200X versus 20X). The final method had a more thorough washing of the lines and a larger dilution (200X) to prevent carryover. The data from four plates of individual samples were not separating significantly and the method was therefore reproducible (Figure S11).

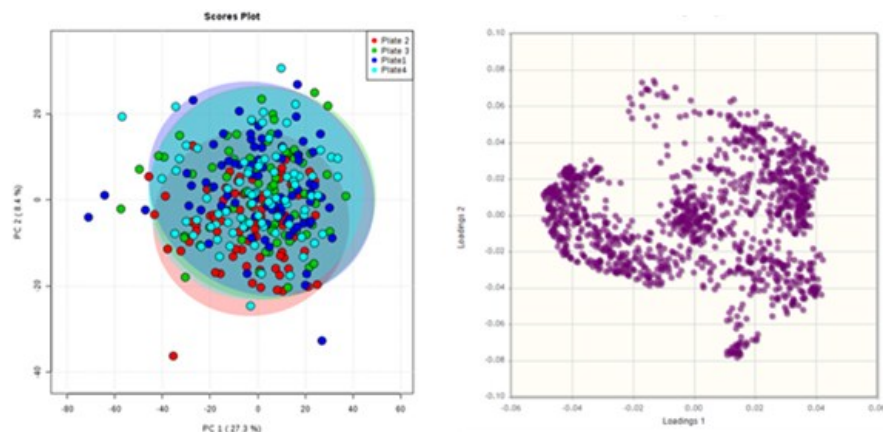

Figure S11 PCA plot of four 96-well plates of random samples with data and collected using the same MRM method. The loading plot does not show separation of any one or any group of analytes.

### 3. ANALYTE IDENTIFICATION BY LC-HRMS

#### 3.1 LC-MS Methods

A ZORBAX Eclipse Plus RRHD C18, 2.1 × 150 mm, 1.8 μm column was used for separating the analytes. IPA/MeOH/water (5:1:4) with 5 mM ammonium acetate and 0.1 % acetic acid (Pump A) and IPA/water (99:1) with 5 mM ammonium acetate and 0.1 % acetic acid (Pump B) were used as mobile phases. The gradient and source conditions are reported in Figure S12. A 2 μL injection of the plasma extract in solvent 2 (no dilution) was used. Full scan MS acquisition ( $m/z$  50 – 1000, 1 s/spectrum) was performed on a pooled sample. An extracted ion chromatogram on the precursor ion provided a retention time for the potential ion of interest. Several targeted MS/MS methods were created with every exact mass and its corresponding retention time. Purine and HP-921 were used as reference ions. These methods provided MS/MS spectra at 10, 20 and 40 V collision energy. The product ion scans were analyzed for the corresponding fragment used in the MRM method. If the precursor and product ion were found, then the identification of the analyte was investigated.



A

| Time [min] | Δ | A [%] | B [%] | Flow [mL/min] | Max. Pressure Limit [bar] |
|------------|---|-------|-------|---------------|---------------------------|
| 0.00       |   | 100.0 | 0.0   | 0.350         | 400.00                    |
| 4.50       |   | 100.0 | 0.0   | 0.350         | ---                       |
| 12.50      |   | 85.0  | 15.0  | 0.350         | ---                       |
| 18.00      |   | 82.0  | 18.0  | 0.350         | ---                       |
| 30.00      |   | 30.0  | 70.0  | 0.350         | ---                       |
| 45.00      |   | 23.0  | 77.0  | 0.350         | ---                       |
| 47.00      |   | 2.0   | 98.0  | 0.350         | ---                       |
| 51.00      |   | 2.0   | 98.0  | 0.350         | ---                       |
| 53.00      |   | 100.0 | 0.0   | 0.350         | ---                       |

B

| Acquisition       | Source   | Chromatogram | Instrument  | Diagnostics |
|-------------------|----------|--------------|-------------|-------------|
| Source parameters |          |              |             |             |
| Gas Temp:         | 300 °C   |              | 300 °C      |             |
| Gas Flow:         | 11 l/min |              | 3.0 l/min   |             |
| Nebulizer:        | 35 psi   |              | 14.9962 psi |             |
| Sheath Gas Temp:  | 300 °C   |              | 124.987 °C  |             |
| Sheath Gas Flow:  | 12 l/min |              | 3.0 l/min   |             |
| Positive          |          | Negative     |             |             |
| Capillary:        | 3500 V   | 3000 V       | 46.3867 nA  |             |
| Nozzle Voltage:   | 0 V      | 0 V          |             |             |
| Chamber Current:  |          |              | 0.23 μA     |             |

Figure S12 LC-AJS conditions for separation of unknown analytes using IPA/MeOH/water (5:1:4) with 5 mM ammonium acetate and 0.1 % acetic acid (Pump A), IPA/water (99:1) with 5 mM ammonium acetate and 0.1 % acetic acid (Pump B), and the gradient reported in (A). The source conditions are reported in (B).

### 3.2 LC-MS Data

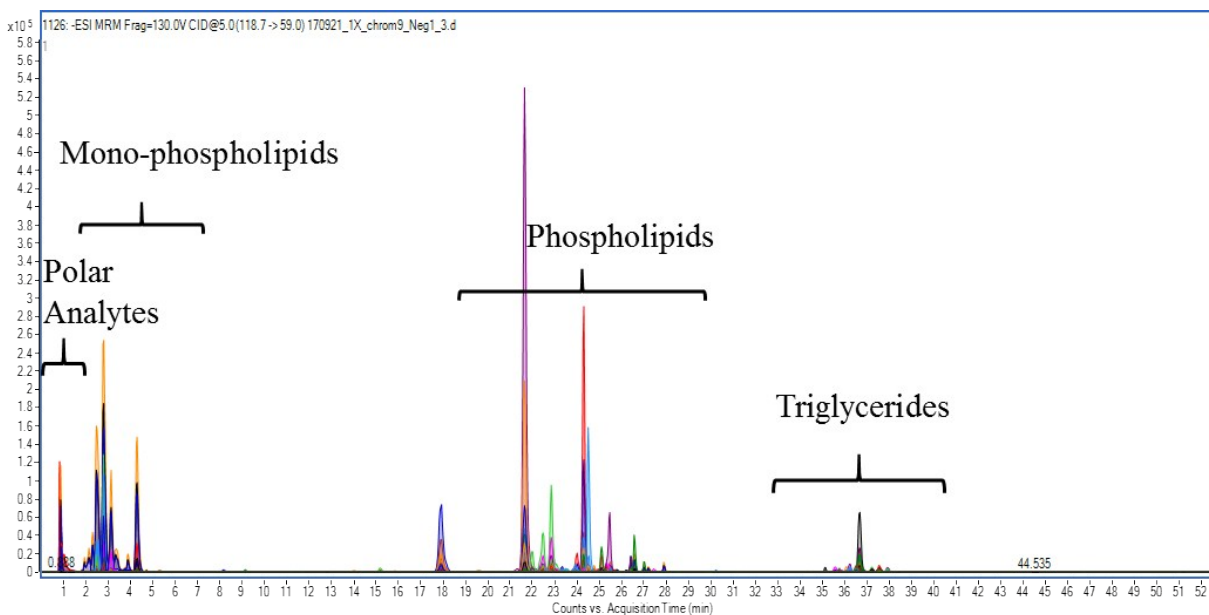

Figure S13 Zorbax C18, 150 x 2.1 mm, 1.8μ column was used with the method described in Figure S12. Data shown here were collected on a 6470 QQQ using the MRM parameters in the MRM-profiling study. Small polar analytes elute in the first minute followed by lyso-phospholipids, then phospholipids, and finally triacylglycerides.

Table S4 LC-MS identification results<sup>a</sup>

| ID                       | Precursor Ion ( <i>m/z</i> ) | Product Ion ( <i>m/z</i> ) | Exact mass ( <i>m/z</i> ) | RT (min) | Adduct | F CAD | M CAD | PAD |
|--------------------------|------------------------------|----------------------------|---------------------------|----------|--------|-------|-------|-----|
| No ID                    | 60.9                         | 43.9                       | Not found in LC method    |          |        |       |       | ↑   |
| No ID                    | 76                           | 58                         | Not found in LC method    |          |        | ↑     | ↑     | ↑   |
| Choline                  | 104                          | 45                         | 104.1071                  | 3        | M+H    |       |       | ↑   |
| No ID                    | 114                          | 43                         | 114.0657                  | 1        | M+H    |       |       | ↑   |
| Octylamine               | 130                          | 71                         | 130.1586                  | 0.9      | M+H    |       |       |     |
|                          | 130                          | 43                         | 130.1586                  | 0.9      | M+H    |       |       |     |
|                          | 130                          | 56                         | 130.1586                  | 0.9      | M+H    | ↑     | ↑     | ↑   |
|                          | 130                          | 85                         | 130.1586                  | 0.9      | M+H    |       |       |     |
|                          | 130                          | 85                         | 130.1586                  | 0.9      | M+H    |       |       |     |
| No ID                    | 144.7                        | 85                         | 144.1017                  | 1        | M+H    | ↑     |       | ↑   |
| Carnitine                | 161.9                        | 85                         | 162.1123                  | 0.9      | M+H    |       |       |     |
|                          | 162                          | 103                        | 162.1123                  | 0.9      | M+H    | ↑     |       | ↑   |
|                          | 162                          | 59                         | 162.1123                  | 0.9      | M+H    |       |       |     |
| γ-hydroxy-L-homoarginine | 204.9                        | 85                         | 205.1271                  | 1        | M+H    |       |       |     |
|                          | 204.9                        | 86                         | 205.1271                  | 1        | M+H    | ↑     |       | ↑   |
| No ID                    | 218                          | 85                         | 218.1084                  | 1        | M+H    |       |       | ↑   |
| No ID                    | 229.1                        | 142.1                      | 229.1544                  | 0.9      | M+H    | ↑     |       | ↑   |
| No ID                    | 232                          | 85                         | Not found in LC method    |          |        | ↑     |       | ↑   |
| No ID                    | 246.1                        | 85                         | Not found in LC method    |          |        |       |       | ↑   |
| No ID                    | 286                          | 85                         | Not found in LC method    |          |        | ↑     |       | ↑   |
| No ID                    | 288                          | 85                         |                           |          |        |       |       |     |
|                          | 288.1                        | 85.1                       | Not found in LC method    |          |        | ↑     |       | ↑   |
|                          | 288.1                        | 85                         |                           |          |        |       |       |     |
| No ID                    | 316.1                        | 85                         |                           |          |        |       |       | ↑   |
| No ID                    | 369.1                        | 287.1                      | 369.3511                  | 37.5     |        |       |       |     |
|                          | 369.2                        | 147.2                      | 369.3511                  | 37.5     |        |       |       |     |
|                          | 369.2                        | 119.2                      | 369.3511                  | 37.5     |        |       |       |     |
|                          | 369.2                        | 175.2                      | 369.3511                  | 37.5     |        |       |       |     |
|                          | 369.2                        | 109.2                      | 369.3511                  | 37.5     |        |       |       |     |
|                          | 369.2                        | 121.2                      | 369.3511                  | 37.5     |        |       |       |     |
|                          | 369.2                        | 91.2                       | 369.3511                  | 37.5     |        |       |       |     |
|                          | 369.2                        | 57.2                       | 369.3511                  | 37.5     |        |       |       |     |
|                          | 369.2                        | 193.2                      | 369.3511                  | 37.5     |        |       |       |     |
|                          | 369.2                        | 147                        | 369.3511                  | 37.5     |        |       |       |     |
|                          | 369.2                        | 85                         | 369.3511                  | 37.5     |        |       |       |     |
|                          | 369.2                        | 85                         | 369.3511                  | 37.5     |        | ↓     |       | ↓   |

|                        |       |       |                        |      |       |   |   |   |
|------------------------|-------|-------|------------------------|------|-------|---|---|---|
| No ID                  | 369.2 | 207.2 | 369.3511               | 37.5 |       |   |   |   |
|                        | 369.3 | 41.3  | 369.3511               | 37.5 |       |   |   |   |
|                        | 369.4 | 68.4  | 369.3511               | 37.5 |       |   |   |   |
|                        | 370.1 | 147   | 370.3546               | 37   |       |   |   |   |
|                        | 370.1 | 288.1 | 370.3546               | 37   |       |   |   |   |
|                        | 370.1 | 229.1 | 370.3546               | 37   |       |   |   |   |
|                        | 370.2 | 69.2  | 370.3546               | 37   |       |   |   |   |
|                        | 370.2 | 148.2 | 370.3546               | 37   |       |   |   |   |
|                        | 370.2 | 176.2 | 370.3546               | 37   |       |   |   |   |
|                        | 370.2 | 149.2 | 370.3546               | 37   |       |   |   |   |
|                        | 370.2 | 120.2 | 370.3546               | 37   |       |   |   |   |
|                        | 370.2 | 41.2  | 370.3546               | 37   | ↓     | ↓ | ↓ |   |
|                        | 370.2 | 122.2 | 370.3546               | 37   |       |   |   |   |
|                        | 370.2 | 92.2  | 370.3546               | 37   |       |   |   |   |
|                        | 370.2 | 194.2 | 370.3546               | 37   |       |   |   |   |
|                        | 370.2 | 97    | 370.3546               | 37   |       |   |   |   |
|                        | 370.3 | 97.1  | 370.3546               | 37   |       |   |   |   |
|                        | 370.3 | 110.3 | 370.3546               | 37   |       |   |   |   |
|                        | 370.3 | 93.1  | 370.3546               | 37   |       |   |   |   |
| MonoChain-PC           | 520.1 | 104   | 520.3371               | 2.6  | M+H   | ↓ | ↓ |   |
| MonoChain-PC           | 521.2 | 104   | 521.3427               | 2.6  | M+NH4 | ↓ | ↓ | ↓ |
| MonoChain-PC           | 542   | 483   | 542.3215               | 2.5  | M+H   | ↓ | ↓ |   |
|                        | 542.1 | 104   | 542.3215               | 2.5  | M+H   |   |   |   |
| No ID                  | 632.3 | 264.3 | Not found in LC method |      |       | ↓ |   |   |
| 20:5 Cholesteryl ester | 671.3 | 303   | 671.5742               | 37.5 | M+H   | ↓ | ↓ | ↓ |
| SM(34:1)               | 725.2 | 542.2 | 725.5563               | 19.5 | M+Na  | ↓ | ↓ |   |
| PC(34:2)               | 758.2 | 104   | 758.5691               | 22.9 | M+H   | ↓ | ↓ |   |
|                        | 758.4 | 86    | 758.5691               | 22.9 | M+H   |   |   |   |
|                        | 780.1 | 575.1 | 780.5515               | 22.9 | M+Na  | ↓ | ↓ |   |
|                        | 780.1 | 721.1 | 780.5515               | 22.9 | M+Na  |   |   |   |
|                        | 780.2 | 147   | 780.5515               | 22.9 | M+Na  |   |   |   |
|                        | 780.2 | 597.2 | 780.5515               | 22.9 | M+Na  |   |   |   |
|                        | 780.2 | 86    | 780.5515               | 22.9 | M+Na  |   |   |   |
| SM(38:1)               | 759.2 | 184   | 759.6366               | 22.5 | M+H   | ↓ | ↓ |   |
|                        | 759.3 | 86    | 759.6366               | 22.5 | M+H   |   |   |   |
|                        | 781.2 | 147   | 781.6187               | 22.5 | M+Na  | ↓ | ↓ |   |
|                        | 781.2 | 598.2 | 781.6187               | 22.5 | M+Na  |   |   |   |
|                        | 781.2 | 576.2 | 781.6187               | 22.5 | M+Na  |   |   |   |
|                        | 781.2 | 86    | 781.6187               | 22.5 | M+Na  |   |   |   |

|                  |       |       |          |      |       |   |   |   |
|------------------|-------|-------|----------|------|-------|---|---|---|
| SM(40:2)         | 785.2 | 184   | 785.653  | 23.8 | M+H   | ↓ |   |   |
|                  | 807.2 | 624.2 | 806.5057 | 23.8 | M+Na  |   |   |   |
|                  | 807.3 | 147   | 806.5057 | 23.8 | M+Na  | ↓ | ↓ |   |
| PC(36:2)         | 786.1 | 104   | 786.6005 | 25   | M+H   |   |   |   |
|                  | 786.3 | 86    | 786.6005 | 25   | M+H   | ↓ |   |   |
|                  | 808.2 | 625.2 | 808.5829 | 25   | M+Na  |   |   |   |
|                  | 808.2 | 603.2 | 808.5829 | 25   | M+Na  | ↓ | ↓ |   |
|                  | 808.3 | 147   | 808.5829 | 25   | M+Na  |   |   |   |
| SM(40:1)         | 787.2 | 184   | 787.6692 | 25.1 | M+H   | ↓ |   |   |
|                  | 809.2 | 147   | 809.6509 | 25.1 | M+Na  |   |   |   |
|                  | 809.2 | 626.2 | 809.6509 | 25.1 | M+Na  | ↓ | ↓ |   |
| PC(37:4)         | 796.1 | 737.1 | 796.5239 | 26.3 | M+H   |   |   |   |
|                  | 796.2 | 86    | 796.5239 | 26.3 | M+H   | ↓ | ↓ |   |
| PC(38:6)         | 806.3 | 147   | 806.5662 | 23.6 | M+H   | ↓ | ↓ |   |
| TAG              | 848.5 | 549.5 | 848.7687 | 37   | M+NH4 |   |   | ↑ |
| TAG              | 850.4 | 577.2 | 850.7868 | 38   | M+NH4 |   |   |   |
|                  | 850.5 | 551.5 | 850.7868 | 38   | M+NH4 | ↑ | ↑ |   |
|                  | 850.5 | 577   | 850.7868 | 38   | M+NH4 |   |   |   |
| TAG              | 851.2 | 577   | 851.7101 | 35.8 | M+H   |   |   | ↑ |
| TAG              | 874.3 | 575.3 | 874.7828 | 37.3 | M+NH4 |   |   |   |
|                  | 874.4 | 601.2 | 874.7828 | 37.3 | M+NH4 |   |   | ↑ |
| TAG              | 876.3 | 577.3 | 876.7995 | 38.5 | M+NH4 |   |   |   |
|                  | 876.4 | 603.2 | 876.7995 | 38.5 | M+NH4 |   |   |   |
|                  | 876.5 | 577   | 876.7995 | 38.5 | M+NH4 | ↑ | ↑ |   |
|                  | 876.5 | 603   | 876.7995 | 38.5 | M+NH4 |   |   |   |
|                  | 877.3 | 578.3 | 877.803  | 38.6 | M+H   |   |   |   |
| TAG              | 877.4 | 604.2 | 877.803  | 38.6 | M+H   |   |   | ↑ |
|                  | 877.5 | 579   | 877.803  | 38.6 | M+H   |   |   |   |
| TAG              | 878.3 | 577.3 | 878.7289 | 36.2 | M+NH4 |   |   | ↑ |
| Salicylic acid   | 136.9 | 92.9  | 137.0252 | 1    | M-H   | ↑ | ↑ | ↑ |
| p-cresol sulfate | 186.9 | 106.9 | 187.0064 | 9.6  | M-H   |   | ↑ | ↑ |

**a)** If known, the exact mass, RT, adduct formed, and compound identification is listed. The up and down arrows in the female CAD, male CAD, and PAD columns indicate if the analyte was up or down regulated in the model.

Table S5 Library of Prec and NL scans for the discovery phase

| Mode     | Type | Value (amu<br>for NL and<br>m/z for Prec) | Functional Group                                                                                             |
|----------|------|-------------------------------------------|--------------------------------------------------------------------------------------------------------------|
| Negative | NL   | 27                                        | H <sub>2</sub> O - amines, aromatic nitrile, aminosulphonic acids <sup>47</sup>                              |
| Negative | NL   | 28                                        | CO - carboxylic acids, aldehydes, H <sub>2</sub> CN - nitroaromatics <sup>47</sup>                           |
| Negative | NL   | 30                                        | NO - nitroaromatics, CH <sub>2</sub> O - aldehydes <sup>47</sup>                                             |
| Negative | NL   | 44                                        | CO <sub>2</sub> - carboxylic acids, carbamates <sup>47</sup>                                                 |
| Negative | NL   | 46                                        | NO <sub>2</sub> - nitroaromatics, CH <sub>2</sub> O <sub>2</sub> - carboxylic acids <sup>47</sup>            |
| Negative | NL   | 62                                        | H <sub>2</sub> O and CO <sub>2</sub> <sup>37</sup>                                                           |
| Negative | NL   | 64                                        | SO <sub>2</sub> - sulfonic acids, sulfonates <sup>47</sup>                                                   |
| Negative | NL   | 76                                        | Phosphatidylglycerol (PG) <sup>40</sup>                                                                      |
| Negative | NL   | 80                                        | SO <sub>3</sub> - sulfonic acids <sup>47</sup>                                                               |
| Negative | NL   | 87                                        | Phosphatidylserine (PS) head group <sup>44</sup>                                                             |
| Negative | NL   | 98                                        | Steroid conjugate <sup>37</sup>                                                                              |
| Negative | NL   | 121                                       | C <sub>3</sub> H <sub>7</sub> NO <sub>2</sub> S - cysteine conjugates <sup>47</sup>                          |
| Negative | NL   | 146                                       | C <sub>6</sub> H <sub>10</sub> O <sub>4</sub> - deoxyhexoside <sup>47</sup>                                  |
| Negative | NL   | 153                                       | Phosphoglycerols including phosphatidic acids (PA) and<br>Lysophosphatidylglycerol (LysoPG) <sup>44</sup>    |
| Negative | NL   | 164                                       | C <sub>6</sub> H <sub>12</sub> O <sub>5</sub> - rhamnoside <sup>47</sup>                                     |
| Negative | NL   | 176                                       | C <sub>6</sub> H <sub>8</sub> O <sub>6</sub> – glucuronides// steroid conjugate <sup>37, 47</sup>            |
| Negative | NL   | 194                                       | Steroid conjugate <sup>37</sup>                                                                              |
| Negative | NL   | 203                                       | C <sub>8</sub> H <sub>13</sub> NO <sub>5</sub> - conjugate with N-acetylglucosamine (benzylic) <sup>47</sup> |
| Negative | NL   | 250                                       | C <sub>8</sub> H <sub>14</sub> N <sub>2</sub> O <sub>5</sub> S - conjugate with gamma-GluCys <sup>47</sup>   |
| Negative | NL   | 282                                       | Oleic acid; Phosphatidylinositol (PI) <sup>44</sup>                                                          |
| Negative | NL   | 355                                       | Phosphatidylcholine (PC), alkylacyl PC (ePC), sphingomyelin<br>(SM) and LysoPC <sup>4</sup>                  |
| Negative | NL   | 444                                       | Oleic acid and inositol; PI <sup>44</sup>                                                                    |
| Negative | Prec | 59                                        | Arachidonic acid (fatty acid) <sup>37</sup>                                                                  |
| Negative | Prec | 80                                        | SO <sub>3</sub> <sup>-37</sup>                                                                               |
| Negative | Prec | 97                                        | Sulfatide (ST)// HSO <sub>4</sub> <sup>-4, 37, 40</sup>                                                      |
| Negative | Prec | 115                                       | HETE <sup>37</sup>                                                                                           |
| Negative | Prec | 127                                       | HETE <sup>37</sup>                                                                                           |
| Negative | Prec | 135                                       | PA                                                                                                           |
| Negative | Prec | 140                                       | Phosphatidylethanolamine (PE)                                                                                |
| Negative | Prec | 145                                       | HETE <sup>37</sup>                                                                                           |
| Negative | Prec | 151                                       | Leukotrienes <sup>37</sup>                                                                                   |
| Negative | Prec | 153.1                                     | glycerophosphate <sup>4, 43</sup>                                                                            |
| Negative | Prec | 155                                       | HETE <sup>37</sup>                                                                                           |
| Negative | Prec | 167                                       | HETE <sup>37</sup>                                                                                           |
| Negative | Prec | 168                                       | SM; demethylated headgroup <sup>44</sup>                                                                     |
| Negative | Prec | 171                                       | PG                                                                                                           |

|          |      |       |                                                                            |
|----------|------|-------|----------------------------------------------------------------------------|
| Negative | Prec | 175   | HETE <sup>37</sup>                                                         |
| Negative | Prec | 179   | HETE <sup>37</sup>                                                         |
| Negative | Prec | 191   | Glucuronide <sup>37</sup>                                                  |
| Negative | Prec | 193   | Glucuronide <sup>37</sup>                                                  |
| Negative | Prec | 195   | Leukotrienes <sup>37</sup>                                                 |
| Negative | Prec | 196   | PE; dilyso-H <sub>2</sub> O <sup>44</sup>                                  |
| Negative | Prec | 199   | glycerolipids; Dodecanoic acid residue                                     |
| Negative | Prec | 207   | HETE <sup>37</sup>                                                         |
| Negative | Prec | 219   | HETE <sup>37</sup>                                                         |
| Negative | Prec | 223   | PI                                                                         |
| Negative | Prec | 225.2 | glycerolipids; myristoleic acid residue and Sulfoquinoovosyldiacylglycerol |
| Negative | Prec | 226   | prostaglandin <sup>37</sup>                                                |
| Negative | Prec | 227.2 | glycerolipids; Myristic acid residue                                       |
| Negative | Prec | 241   | PI head group, nositol phosphate <sup>38, 40</sup>                         |
| Negative | Prec | 253.2 | glycerolipids; Palmitoleic/Sapienic acid residue                           |
| Negative | Prec | 255.2 | glycerolipids; Palmitic acid residue                                       |
| Negative | Prec | 275.2 | glycerolipids; stearidonic acid                                            |
| Negative | Prec | 277.2 | glycerolipids; gama-Linolenic acid residue                                 |
| Negative | Prec | 279.2 | Glycosylphosphatidylinositol (GPI) 18:243, 44                              |
| Negative | Prec | 281.2 | GPI 18:143, 44                                                             |
| Negative | Prec | 283.2 | GPI 18:3 <sup>43, 44</sup>                                                 |
| Negative | Prec | 301   | glycerolipids; Eicosapentaenoic acid residue                               |
| Negative | Prec | 305.2 | glycerolipids; eicosatrienoic residue                                      |
| Negative | Prec | 307.3 | glycerolipids; eicosadienoic residue                                       |
| Negative | Prec | 309.3 | glycerolipids; Gondoic acid residue                                        |
| Negative | Prec | 311.3 | glycerolipids; Arachidic acid residue                                      |
| Negative | Prec | 327.3 | glycerolipids; docosahexaenoic DHA residue                                 |
| Negative | Prec | 329.3 | glycerolipids; Eicosapentaenoic acid EPA residue                           |
| Negative | Prec | 331.3 | glycerolipids; Docosatetraenoic acid residue                               |
| Negative | Prec | 333   | Leukotrienes <sup>37</sup>                                                 |
| Negative | Prec | 335.2 | glycerolipids; docosadienoic residue                                       |
| Negative | Prec | 337.3 | glycerolipids; Erucic acid residue                                         |
| Negative | Prec | 339.3 | glycerolipids; Behenic acid residue                                        |
| Negative | Prec | 355.3 | glycerolipids; nisinic acid residue                                        |
| Negative | Prec | 365.4 | glycerolipids; nervonic acid residue                                       |
| Negative | Prec | 367.4 | glycerolipids; Lignoceric acid residue                                     |
| Negative | Prec | 395.4 | glycerolipids; cerotic acid residue                                        |
| Negative | Prec | 423.4 | glycerolipids; melissic acid residue                                       |
| Negative | Prec | 451.4 | glycerolipids; lacceroic acid residue                                      |
| Negative | Prec | 479.5 | glycerolipids; geddic acid residue                                         |
| Negative | Prec | 507.5 | glycerolipids; montanic acid residue                                       |

|          |    |      |                                                                                                                                                                                                                |
|----------|----|------|----------------------------------------------------------------------------------------------------------------------------------------------------------------------------------------------------------------|
| Positive | NL | 17   | NH <sub>3</sub> - aliphatic amines (aromatic amines), oximes <sup>47</sup>                                                                                                                                     |
| Positive | NL | 18   | H <sub>2</sub> O - carboxylic acids, aldehydes, ester <sup>47</sup>                                                                                                                                            |
| Positive | NL | 27   | H <sub>2</sub> O - amines, aromatic nitrile, aminosulphonic acids <sup>47</sup>                                                                                                                                |
| Positive | NL | 28   | CO - carboxylic acids, aldehydes, H <sub>2</sub> CN - nitroaromatics <sup>47</sup>                                                                                                                             |
| Positive | NL | 30   | NO - nitroaromatics, CH <sub>2</sub> O - aldehydes <sup>47</sup>                                                                                                                                               |
| Positive | NL | 32   | CH <sub>4</sub> O - methyl esters <sup>47</sup>                                                                                                                                                                |
| Positive | NL | 34.0 | H <sub>2</sub> S - thiols <sup>47</sup>                                                                                                                                                                        |
| Positive | NL | 36.0 | HCl –chlorides and 2(H <sub>2</sub> O) <sup>41, 47</sup>                                                                                                                                                       |
| Positive | NL | 44.0 | CO <sub>2</sub> - carboxylic acids, carbamates <sup>47</sup>                                                                                                                                                   |
| Positive | NL | 46.0 | NO <sub>2</sub> - nitroaromatics, CH <sub>2</sub> O <sub>2</sub> - carboxylic acids <sup>47</sup>                                                                                                              |
| Positive | NL | 48   | H <sub>2</sub> O and HCHO- sphingosine <sup>41</sup>                                                                                                                                                           |
| Positive | NL | 50   | Chloromethane- PC <sup>43</sup>                                                                                                                                                                                |
| Positive | NL | 59.0 | Choline species; (CH <sub>3</sub> ) <sub>3</sub> N <sup>40</sup>                                                                                                                                               |
| Positive | NL | 64.0 | CH <sub>4</sub> OS - methionine sulfoxide <sup>47</sup>                                                                                                                                                        |
| Positive | NL | 71.0 | C <sub>3</sub> H <sub>5</sub> NO - serine residue <sup>47</sup>                                                                                                                                                |
| Positive | NL | 74.0 | C <sub>3</sub> H <sub>6</sub> S - methionine side chain <sup>47</sup>                                                                                                                                          |
| Positive | NL | 80.0 | SO <sub>3</sub> - sulfonic acids, HPO <sub>3</sub> - phosphates <sup>47</sup>                                                                                                                                  |
| Positive | NL | 81.0 | HSO <sub>3</sub> - sulfonic acids <sup>47</sup>                                                                                                                                                                |
| Positive | NL | 82.0 | H <sub>2</sub> SO <sub>3</sub> - sulfonate group <sup>47</sup>                                                                                                                                                 |
| Positive | NL | 87   | Serine; PS <sup>43</sup>                                                                                                                                                                                       |
| Positive | NL | 98.0 | H <sub>3</sub> PO <sub>4</sub> - phosphates <sup>47</sup>                                                                                                                                                      |
| Positive | NL | 103  | Lysophospholipid <sup>37</sup>                                                                                                                                                                                 |
| Positive | NL | 115  | Phosphatidic acid                                                                                                                                                                                              |
| Positive | NL | 121  | C <sub>3</sub> H <sub>7</sub> NO <sub>2</sub> S - cysteine conjugates <sup>47</sup>                                                                                                                            |
| Positive | NL | 128  | HI - aromatic iodides <sup>47</sup>                                                                                                                                                                            |
| Positive | NL | 130  | C <sub>6</sub> H <sub>10</sub> O <sub>3</sub> - dideoxyhexoside <sup>47</sup>                                                                                                                                  |
| Positive | NL | 132  | C <sub>5</sub> H <sub>8</sub> O <sub>4</sub> - pentoside <sup>47</sup>                                                                                                                                         |
| Positive | NL | 141  | PE head group <sup>40, 44</sup>                                                                                                                                                                                |
| Positive | NL | 146  | Pro/anthocyanidins; C <sub>6</sub> H <sub>10</sub> O <sub>4</sub> - deoxyhexoside, C <sub>5</sub> H <sub>10</sub> N <sub>2</sub> O <sub>3</sub> - conjugate with gamma-GluCys or glutathione <sup>47, 48</sup> |
| Positive | NL | 162  | Pro/anthocyanidins; C <sub>6</sub> H <sub>10</sub> O <sub>5</sub> - hexoside <sup>47, 48</sup>                                                                                                                 |
| Positive | NL | 163  | C <sub>5</sub> H <sub>9</sub> NO <sub>3</sub> S - N-acetylcysteine conjugate <sup>47</sup>                                                                                                                     |
| Positive | NL | 176  | C <sub>6</sub> H <sub>8</sub> O <sub>6</sub> - glucuronides <sup>47</sup>                                                                                                                                      |
| Positive | NL | 179  | Glycosylinositolphosphoceramide (GIPC)                                                                                                                                                                         |
| Positive | NL | 183  | Phosphocholine (Li+) <sup>43</sup>                                                                                                                                                                             |
| Positive | NL | 185  | PS head group <sup>40, 44</sup>                                                                                                                                                                                |
| Positive | NL | 189  | PG headgroup <sup>49</sup>                                                                                                                                                                                     |
| Positive | NL | 194  | C <sub>6</sub> H <sub>10</sub> O <sub>7</sub> - glucuronides (benzylic) <sup>47</sup>                                                                                                                          |
| Positive | NL | 203  | C <sub>8</sub> H <sub>13</sub> NO <sub>5</sub> - conjugate with N-acetylglucosamine (benzylic) <sup>47</sup>                                                                                                   |
| Positive | NL | 205  | lysophospholipids <sup>37</sup>                                                                                                                                                                                |
| Positive | NL | 217  | glycerolipids; Dodecanoic acid residue <sup>39</sup>                                                                                                                                                           |
| Positive | NL | 221  | C <sub>8</sub> H <sub>15</sub> NO <sub>6</sub> - conjugate with N-acetylglucosamine <sup>47</sup>                                                                                                              |

|          |    |       |                                                                                                            |
|----------|----|-------|------------------------------------------------------------------------------------------------------------|
|          |    |       | TAG 14:0                                                                                                   |
| Positive | NL | 228   |                                                                                                            |
| Positive | NL | 245   | glycerolipids; Myristic acid residue <sup>39</sup>                                                         |
| Positive | NL | 248   | C <sub>9</sub> H <sub>12</sub> O <sub>8</sub> – malonylglucuronides <sup>47</sup>                          |
| Positive | NL | 250   | C <sub>8</sub> H <sub>14</sub> N <sub>2</sub> O <sub>5</sub> S - conjugate with gamma-GluCys <sup>47</sup> |
| Positive | NL | 254   | TAG 16:1 <sup>43</sup>                                                                                     |
| Positive | NL | 256   | TAG 16:0 <sup>43</sup>                                                                                     |
| Positive | NL | 257   | glycerolipids; myristoleic acid residue <sup>39</sup>                                                      |
| Positive | NL | 260   | glycerophosphoserine <sup>37</sup>                                                                         |
| Positive | NL | 266   | C <sub>9</sub> H <sub>14</sub> O <sub>9</sub> - malonylglucuronides (benzylic) <sup>47</sup>               |
| Positive | NL | 271   | glycerolipids; Palmitoleic/Sapienic acid residue TAG <sup>38, 39</sup>                                     |
| Positive | NL | 273   | TAG 16:0 <sup>38, 39</sup>                                                                                 |
| Positive | NL | 273.2 | TAGs; NH <sub>4</sub> <sup>+</sup> CH <sub>3</sub> (CH <sub>2</sub> ) <sub>14</sub> COOH <sup>38</sup>     |
| Positive | NL | 277   | PI <sup>49</sup>                                                                                           |
| Positive | NL | 277.2 | TAGS <sup>38</sup>                                                                                         |
| Positive | NL | 278   | TAG 18:3 <sup>43</sup>                                                                                     |
| Positive | NL | 280   | TAG 18:2 <sup>43</sup>                                                                                     |
| Positive | NL | 282   | TAG 18:1 <sup>43</sup>                                                                                     |
| Positive | NL | 284   | TAG 18:0 <sup>43</sup>                                                                                     |
| Positive | NL | 293   | glycerolipids; stearidonic acid                                                                            |
| Positive | NL | 295   | TAG <sup>39</sup>                                                                                          |
| Positive | NL | 297   | TAG <sup>39</sup>                                                                                          |
| Positive | NL | 299   | TAG <sup>38, 39</sup>                                                                                      |
| Positive | NL | 301   | TAG <sup>38</sup>                                                                                          |
| Positive | NL | 304   | TAG 20:4 <sup>43</sup>                                                                                     |
| Positive | NL | 307   | C <sub>10</sub> H <sub>17</sub> N <sub>3</sub> O <sub>6</sub> Sglutathione conjugates <sup>47</sup>        |
| Positive | NL | 312   | TAG 20:0 <sup>43</sup>                                                                                     |
| Positive | NL | 319   | glycerolipids; Eicosapentaenoic acid residue <sup>39</sup>                                                 |
| Positive | NL | 321   | glycerolipids; Arachidonic acid residue <sup>39</sup>                                                      |
| Positive | NL | 323.0 | glycerolipids; eicosatrienoic residue <sup>39</sup>                                                        |
| Positive | NL | 325.0 | TAG 20:2 <sup>39</sup>                                                                                     |
| Positive | NL | 327.0 | TAG 20:1 <sup>39</sup>                                                                                     |
| Positive | NL | 328   | TAG 22:0 <sup>43</sup>                                                                                     |
| Positive | NL | 329.0 | TAG 20:0 <sup>39</sup>                                                                                     |
| Positive | NL | 341.0 | Digalactosyldiacylglycerol (DGDG) and monogalactosyldiacylglycerol (MGDG) <sup>50</sup>                    |
| Positive | NL | 345.0 | glycerolipids; docosahexaenoic DHA residue <sup>39</sup>                                                   |
| Positive | NL | 347.0 | glycerolipids; Eicosapentaenoic acid EPA residue <sup>39</sup>                                             |
| Positive | NL | 349.0 | glycerolipids; Docosatetraenoic acid residue <sup>39</sup>                                                 |
| Positive | NL | 353.0 | glycerolipids; docosadienoic residue <sup>39</sup>                                                         |
| Positive | NL | 355.0 | glycerolipids; Erucic acid residue <sup>39</sup>                                                           |



|          |      |       |                                                                                                 |
|----------|------|-------|-------------------------------------------------------------------------------------------------|
| Positive | NL   | 357.0 | glycerolipids; Behenic acid residue <sup>39</sup>                                               |
| Positive | NL   | 375.0 | glycerolipids; nisinic acid residue                                                             |
| Positive | NL   | 383.0 | glycerolipids; nervonic acid residue                                                            |
| Positive | NL   | 385.0 | glycerolipids; Lignoceric acid residue <sup>39</sup>                                            |
| Positive | NL   | 413.0 | glycerolipids; cerotic acid residue                                                             |
| Positive | NL   | 441.0 | glycerolipids; melissics acid residue                                                           |
| Positive | NL   | 469.0 | glycerolipids; melissics acid residue                                                           |
| Positive | NL   | 497.0 | glycerolipids; melissics acid residue                                                           |
| Positive | NL   | 525.0 | glycerolipids; melissics acid residue                                                           |
| Positive | Prec | 85    | Acylcarnitines <sup>4</sup>                                                                     |
| Positive | Prec | 86    | PC, LPC, SM; OHCH <sub>2</sub> CH <sub>2</sub> NMe <sub>3</sub> -H <sub>2</sub> O <sup>40</sup> |
| Positive | Prec | 104   | PC, LPC, SM; choline <sup>40</sup>                                                              |
| Positive | Prec | 147   | Lysophospholipids <sup>37</sup>                                                                 |
| Positive | Prec | 153   | Glycerophosphate <sup>43</sup>                                                                  |
| Positive | Prec | 166   | PC/LPC/SM <sup>40</sup>                                                                         |
| Positive | Prec | 181   | Lysophospholipids <sup>37</sup>                                                                 |
| Positive | Prec | 184   | Phosphatidylcholine (PC), alkyl-acyl PC (ePC), sphingomyelin (SM) and LysoPC <sup>40, 44</sup>  |
| Positive | Prec | 256.3 | Ceramides 16:0 <sup>42</sup>                                                                    |
| Positive | Prec | 262.3 | Ceramides d18:2 <sup>42</sup>                                                                   |
| Positive | Prec | 264   | Ceramides <sup>37</sup>                                                                         |
| Positive | Prec | 264.3 | Ceramides (d18:1; sphingosines)/Cerebrosides <sup>42, 46</sup>                                  |
| Positive | Prec | 266   | Ceramides <sup>37</sup>                                                                         |
| Positive | Prec | 266.4 | Ceramides (d18:0; sphinganine) <sup>42, 46</sup>                                                |
| Positive | Prec | 279   | Ceramides <sup>43</sup>                                                                         |
| Positive | Prec | 280   | Ceramides <sup>37</sup>                                                                         |
| Positive | Prec | 282.2 | Ceramides (t18:0 4-hydroxysphinganine) <sup>42, 46</sup>                                        |
| Positive | Prec | 282.4 | Ceramides 18:0 <sup>37, 42</sup>                                                                |
| Positive | Prec | 283   | Ceramides <sup>43</sup>                                                                         |
| Positive | Prec | 284.3 | Ceramides 18:0 <sup>42</sup>                                                                    |
| Positive | Prec | 292.3 | Ceramides d20:1 <sup>42</sup>                                                                   |
| Positive | Prec | 292.4 | Ceramides (d20:1) <sup>46</sup>                                                                 |
| Positive | Prec | 300.3 | Ceramides 18:0(OH) <sup>42</sup>                                                                |
| Positive | Prec | 301   | Pro/anthocyanidins <sup>48</sup>                                                                |
| Positive | Prec | 303   | Pro/anthocyanidins <sup>48</sup>                                                                |
| Positive | Prec | 307.3 | Ceramides <sup>42</sup>                                                                         |
| Positive | Prec | 310.3 | Ceramides 20:0 <sup>42</sup>                                                                    |
| Positive | Prec | 312   | Pro/anthocyanidins <sup>48</sup>                                                                |
| Positive | Prec | 328.3 | Ceramides 20:0(OH) <sup>42</sup>                                                                |
| Positive | Prec | 338.3 | Ceramides 22:0 <sup>42</sup>                                                                    |
| Positive | Prec | 340.4 | Ceramides 22:0(OH) <sup>42</sup>                                                                |
| Positive | Prec | 352.4 | Ceramides 23:1 <sup>42</sup>                                                                    |

|          |      |       |                                                           |
|----------|------|-------|-----------------------------------------------------------|
| Positive | Prec | 354.4 | Ceramides 23:0 <sup>42</sup>                              |
| Positive | Prec | 356.4 | Ceramides 23:0(OH) <sup>42</sup>                          |
| Positive | Prec | 366.4 | Ceramides 24:1 <sup>42</sup>                              |
| Positive | Prec | 368.4 | Ceramides 24:0 or 23:1(OH) <sup>42</sup>                  |
| Positive | Prec | 369.1 | Cholesterol esters <sup>51</sup>                          |
| Positive | Prec | 370.4 | Ceramides 23:0(OH) <sup>42</sup>                          |
| Positive | Prec | 380.4 | Ceramides 25:1 <sup>42</sup>                              |
| Positive | Prec | 382.4 | Ceramides 25:0 or 24:1(OH) <sup>42</sup>                  |
| Positive | Prec | 384.4 | Ceramides 24:0 <sup>42</sup>                              |
| Positive | Prec | 523   | TAG, NH <sub>4</sub> fatty acyl substituent <sup>38</sup> |
| Positive | Prec | 537   | TAG, NH <sub>4</sub> fatty acyl substituent <sup>38</sup> |
| Positive | Prec | 549.5 | TAG, NH <sub>4</sub> fatty acyl substituent <sup>38</sup> |
| Positive | Prec | 551.5 | TAG, NH <sub>4</sub> fatty acyl substituent <sup>38</sup> |
| Positive | Prec | 563.5 | TAG, NH <sub>4</sub> fatty acyl substituent <sup>38</sup> |
| Positive | Prec | 565.5 | TAG, NH <sub>4</sub> fatty acyl substituent <sup>38</sup> |
| Positive | Prec | 577   | TAG, NH <sub>4</sub> fatty acyl substituent <sup>38</sup> |
| Positive | Prec | 579   | TAG, NH <sub>4</sub> fatty acyl substituent <sup>38</sup> |
| Positive | Prec | 603   | TAG <sup>38</sup>                                         |
